# Supplementary material for: Efficient sequestration of lead from aqueous systems by peanut shells and compost: evidence from fixed bed column and batch scale studies
Source: PeerJ journal article supplement (doi:10.7717/peerj-pchem.21), 2022-01-21
Supplement: Modeling_and_Column_raw_data.xlsx [file Modeling_and_Column_raw_data.xlsx]

## Sheet: Column data
		Peanut shells at 3 ml/min			CCB at 3 ml/min
	C0=25 mg/L	C0=50 mg/L	R%		C0=25 mg/L	C0=50 mg/L	R%
Time	CtMean	CtMean	R% at 25 mg/L	R% at 50 mg/L	CtMean	CtMean	R% at 25 mg/L	R% at 50 mg/L
15	0	0	100	100	0.01	0.25	99.96	99.5
30	0.01	0.1	99.96	99.8	0.5	1.5	98	97
60	0.05	1.2	99.8	97.6	2.4	5.9	90.4	88.2
120	3.02	7.4	87.92	85.2	5.7	12.5	77.2	75
180	6.53	15.5	73.88	69	9.1	20.4	63.6	59.2
240	9.15	22.6	63.4	54.8	12.3	28.4	50.8	43.2
300	13.34	29.3	46.64	41.4	16.9	37	32.4	26
360	17.34	38.8	30.64	22.4	21.4	44.3	14.4	11.4
420	22.5	47.2	10	5.6	24.5	48.5	2	3
480	23.8	49.2	4.8	1.6	24.9	49.6	0.4	0.8
540	24.1	49.8	3.6	0.4	24.98	49.9	0.08	0.2
600	24.8	49.9	0.8	0.2	24.99	49.95	0.04	0.1
	Peanut shells biosorbent at C0=25 mg/L				CCB at C0=25 mg/L
	2.5 ml/min	5 ml/min	R%		2.5 ml/min	5 ml/min	R%
Time	CtMean	CtMean	R% at 2.5 ml/min	R% at 5 ml/min	CtMean	CtMean	R% at 2.5 ml/min	R% at 5 ml/min
15	0	0	100	100	0.01	0.15	99.96	99.4
30	0.01	0.03	99.96	99.88	0.5	1.35	98	94.6
60	0.05	1.2	99.8	95.2	2.4	4.2	90.4	83.2		CO	Q( ml/min)	t (min)	Veff=Q*ttoal	mtotal (mg)=(C0Q* total time)/1000
120	3.02	5	87.92	80	5.7	8.9	77.2	64.4		30	3	600	1800	54
180	6.53	9.4	73.88	62.4	9.1	16.6	63.6	33.6		60	3	420	1260	75.6
240	9.15	13.5	63.4	46	12.3	21.2	50.8	15.2
300	13.34	19.2	46.64	23.2	16.9	24.5	32.4	2
360	17.34	22.4	30.64	10.4	21.4	24.8	14.4	0.8
420	22.5	24.6	10	1.6	24.5	24.9	2	0.4
480	23.8	24.95	4.8	0.2	24.9	24.95	0.4	0.2
540	24.1	24.97	3.6	0.12	24.98	24.96	0.08	0.16
600	24.8	24.99	0.8	0.04	24.99	24.95	0.04	0.2
Bed height )0.6 cm=3 g/columnn and 1.2 cm=6g/column at C0=25 mg/L
	Peanut shells				BCC
	3 g/column	6 g/column	R%		3 g/column	6 g/column	R%
Time	CtMean	CtMean	R% at 3g	R% at 6 g	CtMean	CtMean	R at 3 g	R at 6 g
15	0	0	100	100	0.01	0	99.96	100
30	0.01	0.007	99.96	99.972	0.5	0.1	98	99.6
60	0.05	0.03	99.8	99.88	2.4	2.1	90.4	91.6
120	3.02	1	87.92	96	5.7	3.8	77.2	84.8
180	6.53	4.1	73.88	83.6	9.1	6.9	63.6	72.4
240	9.15	6.7	63.4	73.2	12.3	10.2	50.8	59.2
300	13.34	9.2	46.64	63.2	16.9	13.2	32.4	47.2
360	17.34	14.23	30.64	43.08	21.4	16.4	14.4	34.4
420	22.5	18.4	10	26.4	24.5	20.3	2	18.8
480	23.8	22.1	4.8	11.6	24.9	22.8	0.4	8.8
540	24.1	23.4	3.6	6.4	24.98	24.8	0.08	0.8
600	24.8	24.5	0.8	2	24.99	24.94	0.04	0.24

## Sheet: kinetic and Eq modeling
																				PSB
								Pea nut shells at 2.5 g/L										t	t0.5	Ct	qt	t/qt	LN(qe-qt)				Peanut shells	CCB	CCB
CCB at 2.5 g/L							initial	CeMean	qe (mg/g)	ceq/q(g/l)	q calculated	ln Ce	lnqe	qecal=Kf*Ceq^1/n				15	3.87298	25.3	9.88	1.51822	1.805				49.4	37.4	5.04	25.2
initial	CeMean	qe	Ceq/q	ln Ce	Qcalculated	lnqe	25	2.5	9	0.277778	7.09167	0.916291	2.19722	5.92924				30	5.47723	14.1	14.36	2.08914	0.470004				71.8	25.6	9.76	48.8
25	5.2	7.92	0.656566	1.64866	7.54958	2.06939	50	10.1	15.96	0.632832	19.0157	2.31254	2.77009	10.968				60	7.74597	13.5	14.6	4.10959	0.307485				73	18.4	12.64	63.2
50	15.1	13.96	1.08166	2.71469	14.1928	2.6362	75	16.3	23.48	0.694208	24.0821	2.79117	3.15615	13.5425				120	10.9545	11	15.6	7.69231	-1.02165				78	16.5	13.4	67
75	30.2	17.92	1.68527	3.40784	18.4584	2.88592	100	25.1	29.96	0.837784	28.4044	3.22287	3.39986	16.3792				180	13.4164	10.1	15.96	11.2782					79.8	15.1	13.96	69.8
100	47.5	21	2.2619	3.86073	20.7273	3.04452	slope=1/Qmax		0.041
							Qmax	1/slop	24.3902									CCB
							1/KL*Qmax=intercept											t	t0.5	Ct	qt	t/qt	LN(qe-qt)
		qcalcu=(Kl*Ceq*Qmax)/(1+Kl*Ceq)					KL=1/INTERCEPT*Qmax		0.0524699									15	3.87298	37.4	5.04	2.97619	2.1883
																		30	5.47723	25.6	9.76	3.07377	1.43508
																		60	7.74597	18.4	12.64	4.74684	0.277632
	Langmuir																	120	10.9545	16.5	13.4	8.95522	-0.579818
		slope=1/Qmax	Qmax=1/slope	1/KL*Qmax=intercept	KL=1/INTERCEPT*Qmax	R2												180	13.4164	15.1	13.96	12.894
	CCB	0.0379	26.3852	0.4918	0.0770638	0.99
	PSB	0.0235	42.5532	0.2937	0.0800136	0.89																												k2=1/(intercept*qe^2)
	Freundlich																								PFO						PSO
		slope=1/n	n=1/slope	intercept=lnkf	kf=exp(intercept)	R2																				INTE=lnqe	qe=exp(intercept)	slope=kt/2.303	kt=slope*2.303	R2		Slope=1/qe	qe=1/slope	intercept=1/k2*qe^2	k2=1/(intercept*qe^2)	R2
	CCB	0.4415	2.26501	1.3752	3.95587	0.99																			PSB	1.7	5.47395	0.02	0.04606	0.88	PSB	0.06	16.6667	0.48	0.0075	0.99
	PSB	0.5183	1.92938	1.6831	5.38222	0.98																			CCB	2.26	9.58309	0.03	0.06909	0.92	CCB	0.064	15.625	1.45	0.00282483	0.99
																																			8
																									Intra-particle diffusion
																										slope=kp	intercept=c	R2
																									PSB	0.51	9.85	0.67
																									CCB	0.83	4.11	0.77
